# Supplementary material for: Mechanical Disintegration and Particle Size Sieving of Chondrus crispus (Irish Moss) Gametophytes and Their Effect on Carrageenan and Phycoerythrin Extraction
Source: MDPI journal article supplement (doi:10.3390/foods10122928), 2021-11-26
Supplement: s1 [file s1]

Supplementary Table S1. Composition of the different seaweed size fractions.

| Size<br>fractions (µm) | Seaweed composition (wt%) |            |           |           |            |           |           |            |
|------------------------|---------------------------|------------|-----------|-----------|------------|-----------|-----------|------------|
|                        | 3,6-Angal                 | Galactose  | Xylose    | Glucose   | Protein    | Sodium    | Potassium | Sulfate    |
| <50                    | 12.8 ± 0.7                | 24.7 ± 0.4 | 0.6 ± 0.1 | 1.3 ± 0.1 | 17.0 ± 0.1 | 7.5 ± 0.1 | 9.1 ± 0.1 | 13.6 ± 0.1 |
| 50-100                 | 11.6 ± 2.2                | 23.0 ± 3.3 | 0.5 ± 0.2 | 1.2 ± 0.1 | 18.3 ± 0.1 | 5.5 ± 0.1 | 7.3 ± 0.1 | 12.9 ± 0.1 |
| 100-150                | 11.6 ± 2.4                | 22.6 ± 2.6 | 0.5 ± 0.1 | 1.0 ± 0.1 | 18.2 ± 0.1 | 6.2 ± 0.1 | 7.2 ± 0.1 | 13.1 ± 0.1 |
| 150-250                | 11.7 ± 1.9                | 22.1 ± 0.4 | 0.5 ± 0.1 | 0.9 ± 0.1 | 17.7 ± 0.1 | 5.5 ± 0.1 | 6.2 ± 0.1 | 17.4 ± 0.1 |
| 250-500                | 14.3 ± 3.6                | 26.1 ± 2.3 | 0.5 ± 0.1 | 1.2 ± 0.1 | 16.9 ± 0.1 | 6.7 ± 0.1 | 7.7 ± 0.1 | 13.7 ± 0.1 |
| 500-1000               | 12.9 ± 0.9                | 25.5 ± 1.3 | 0.4 ± 0.1 | 1.0 ± 0.2 | 18.1 ± 0.3 | 6.2 ± 0.1 | 6.6 ± 0.1 | 13.2 ± 0.1 |
| 1000-2000              | 15.2 ± 3.2                | 28.9 ± 3.1 | 0.7 ± 0.1 | 1.9 ± 0.1 | 17.7 ± 0.6 | 6.9 ± 0.1 | 7.2 ± 0.1 | 12.4 ± 0.1 |
| >2000                  | 16.6 ± 5.7                | 26.9 ± 4.7 | 0.7 ± 0.1 | 0.7 ± 0.1 | 16.1 ± 0.1 | 6.6 ± 0.1 | 7.4 ± 0.1 | 14.7 ± 0.1 |

Values are mean ± standard deviation, n = 2. 3,6-Angal = 3,6-Anhydrogalactose

Supplementary Table S2. Filtrate conductivity and pH values of filtrates extracted from each size fractions at various extraction times and temperatures.

| T (°C) | Fraction size (μm) | Conductivity (μS/cm) |            |            | pH        |           |           |
|--------|--------------------|----------------------|------------|------------|-----------|-----------|-----------|
|        |                    | 15 min               | 30 min     | 120 min    | 15 min    | 30 min    | 120 min   |
| 22     | <50                | 5000 ± 99            | 5010 ± 56  | 5235 ± 63  | 6.9 ± 0.1 | 6.9 ± 0.1 | 6.9 ± 0.1 |
|        | 50-100             | 4770 ± 70            | 4695 ± 21  | 4875 ± 304 | 6.8 ± 0.1 | 6.8 ± 0.1 | 6.8 ± 0.1 |
|        | 100-150            | 4675 ± 63            | 4535 ± 35  | 4785 ± 7   | 6.7 ± 0.1 | 6.8 ± 0.1 | 6.8 ± 0.1 |
|        | 150-250            | 4755 ± 120           | 4585 ± 63  | 4940 ± 70  | 6.7 ± 0.1 | 6.7 ± 0.1 | 6.7 ± 0.1 |
|        | 250-500            | 4620 ± 42            | 4610 ± 113 | 4645 ± 91  | 6.7 ± 0.1 | 6.7 ± 0.1 | 6.7 ± 0.1 |
|        | 500-1000           | 4650 ± 28            | 4625 ± 63  | 4605 ± 21  | 6.8 ± 0.1 | 6.8 ± 0.1 | 6.9 ± 0.1 |
|        | 1000-2000          | 4750 ± 56            | 4775 ± 91  | 4745 ± 77  | 6.7 ± 0.1 | 6.7 ± 0.1 | 6.7 ± 0.1 |
|        | >2000              | 4715 ± 49            | 4725 ± 21  | 4760 ± 183 | 6.8 ± 0.1 | 6.7 ± 0.1 | 6.8 ± 0.1 |
| 45     | <50                | 5365 ± 636           | 5630 ± 50  | 5080 ± 50  | 6.8 ± 0.1 | 6.8 ± 0.1 | 6.9 ± 0.1 |
|        | 50-100             | 5035 ± 134           | 5050 ± 11  | 5090 ± 56  | 6.6 ± 0.1 | 6.6 ± 0.1 | 6.7 ± 0.1 |
|        | 100-150            | 5130 ± 311           | 5015 ± 77  | 5065 ± 120 | 6.6 ± 0.1 | 6.6 ± 0.1 | 6.6 ± 0.1 |
|        | 150-250            | 4795 ± 374           | 5050 ± 14  | 5220 ± 56  | 6.6 ± 0.1 | 6.6 ± 0.1 | 6.5 ± 0.1 |
|        | 250-500            | 4810 ± 42            | 5245 ± 431 | 5385 ± 134 | 6.6 ± 0.1 | 6.6 ± 0.1 | 6.6 ± 0.1 |
|        | 500-1000           | 4855 ± 35            | 5075 ± 190 | 5245 ± 417 | 6.7 ± 0.1 | 6.7 ± 0.1 | 6.7 ± 0.1 |
|        | 1000-2000          | 5020 ± 28            | 5185 ± 374 | 5350 ± 650 | 6.6 ± 0.1 | 6.6 ± 0.1 | 6.6 ± 0.1 |
|        | >2000              | 5060 ± 14            | 5525 ± 21  | 5185 ± 459 | 6.6 ± 0.1 | 6.6 ± 0.1 | 6.6 ± 0.1 |
| 90     | <50                | 5535 ± 63            | 5760 ± 50  | 5840 ± 50  | 6.9 ± 0.1 | 6.9 ± 0.2 | 6.9 ± 0.1 |
|        | 50-100             | 5300 ± 134           | 5070 ± 113 | 5845 ± 56  | 6.8 ± 0.1 | 6.7 ± 0.1 | 6.6 ± 0.1 |
|        | 100-150            | 5360 ± 311           | 5360 ± 77  | 5815 ± 120 | 6.7 ± 0.1 | 6.7 ± 0.1 | 6.5 ± 0.1 |
|        | 150-250            | 5650 ± 374           | 5280 ± 14  | 5710 ± 56  | 6.6 ± 0.1 | 6.8 ± 0.2 | 6.4 ± 0.1 |
|        | 250-500            | 5525 ± 42            | 5275 ± 431 | 5625 ± 134 | 6.6 ± 0.1 | 6.6 ± 0.1 | 6.5 ± 0.2 |
|        | 500-1000           | 5470 ± 35            | 5415 ± 190 | 5345 ± 417 | 6.6 ± 0.1 | 6.7 ± 0.1 | 6.6 ± 0.2 |
|        | 1000-2000          | 5430 ± 28            | 5460 ± 374 | 5650 ± 650 | 6.6 ± 0.1 | 6.6 ± 0.1 | 6.5 ± 0.1 |
|        | >2000              | 5515 ± 14            | 5695 ± 21  | 5685 ± 459 | 6.7 ± 0.1 | 6.7 ± 0.1 | 6.5 ± 0.1 |

Values are mean ± standard deviation,  $n = 2$ .
